# Supplementary material for: Rehydration of Dried Mushroom Specimens With Aerosol OT&nbsp;for Scanning Electron Microscopy
Source: Research Square preprint supplement (doi:10.21203/rs.3.rs-252417/v1), 2021-03-05
Supplement: Supplementary file 1 [file 930034c6d65295b8174d07ee.docx]

Ref.: Ms. No. MYPR-D-20-00039
Rehydration with Aerosol OT of dried mushroom specimen for scanning electron microscopy studies
Mycological Progress

Dear Dr. Rexer,

a reviewer has now commented on your paper. You will see that he is advising that you revise your manuscript. If you are prepared to undertake the work required, I would be pleased to reconsider my decision.

For your guidance, the reviewer's comments are appended below.

If you decide to revise the work, please submit a list of changes or a rebuttal against each point which is being raised when you submit the revised manuscript.

Your revision is due by 02 May 2020.

To submit a revision, go to https://www.editorialmanager.com/mypr/ and log in as an Author. You will see a menu item call Submission Needing Revision. You will find your submission record there. Please make sure to submit your editable source files (i. e. Word, TeX)

While submitting, please check the filled in author data carefully and update them if applicable - they need to be complete and correct in order for the revision to be processed further.

Yours sincerely

Marc Stadler, Ph. D. (Dr. rer. nat.)
Editor-in-Chief
Mycological Progress

Reviewer's comments:

Reviewer #1: The study presented is useful and the results interesting. However, there are two points wihc require attention.

1. The English needs proofreading by a native speaker. There are several cases of odd word usage and sometimes unusual sentence constructions. I have highlighted some exemplary cases below.

*The manuscript is totally revised, including the title (which now sounds better)*

2. What is required for this study is a direct comparison of fresh material and herbarium specimens. Only through the comparison with fresh material, the performance and potential artefacts of the message can really be evaluated.

*The comparison of freshly collected and fixed material is now included. The additional results were discussed.*
Line 8. There is no such thing as "molecular times".
Line 12. It is unlikely that it is "the best" method, which would mean that no improvements are possible.
Line 29. What is meant by "change"?
Line 42. huge -- great.
Line 46. disposing -- adding .. to
